# Supplementary material
Source: PubMed Central journal article supplement (PMC7526846)
Supplement: AAC.00143-20-s0001.pdf [file AAC.00143-20-s0001.pdf]

## 1 Supplementary figures

2

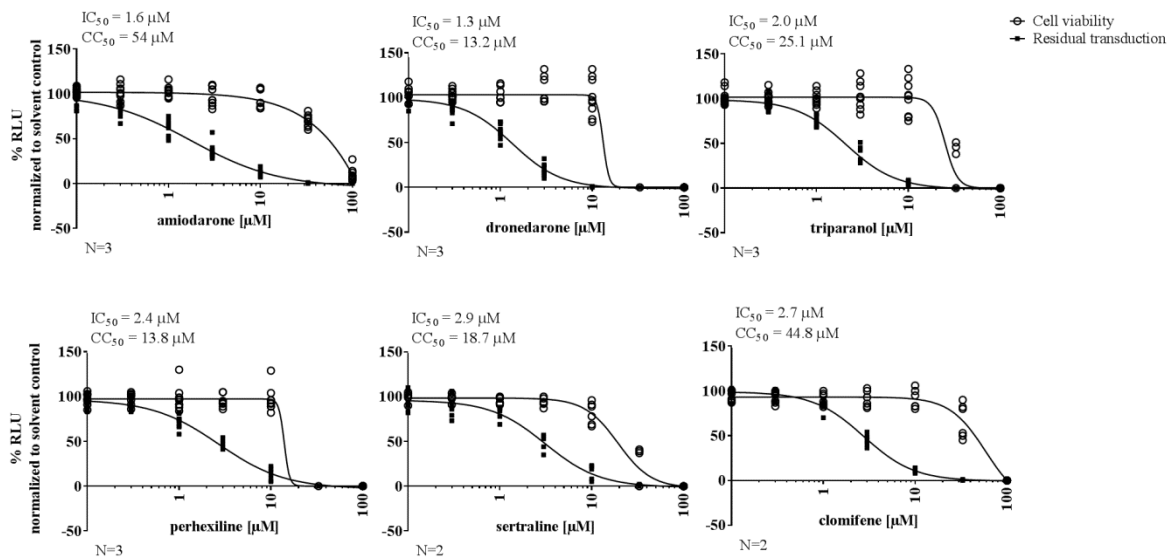

3

4 **Figure S1: Concentration-response curves of MARVpp gp-mediated antiviral**  
5 **activity and cytotoxicity of the six strongest CADs of our screen.**

6 EA.hy926 cells were transduced with MARVpp encoding an NLuc reporter gene in  
7 the presence of increasing concentrations of the six most strongly antiviral CADs of  
8 our screen: amiodarone, dronedarone, triparanol, perhexiline, sertraline or clomifene  
9 (filled squares). For cytotoxicity measurement, EA.hy-NLuc cells were incubated with  
10 increasing concentrations of the same six CADs (empty circles). For both  
11 approaches, luciferase activity was measured. The replicate values of n=2 or n=3  
12 experiments were normalised to mean solvent control and the  $\text{IC}_{50}$  and  $\text{CC}_{50}$  values  
13 were interpolated from standard curve fitting.

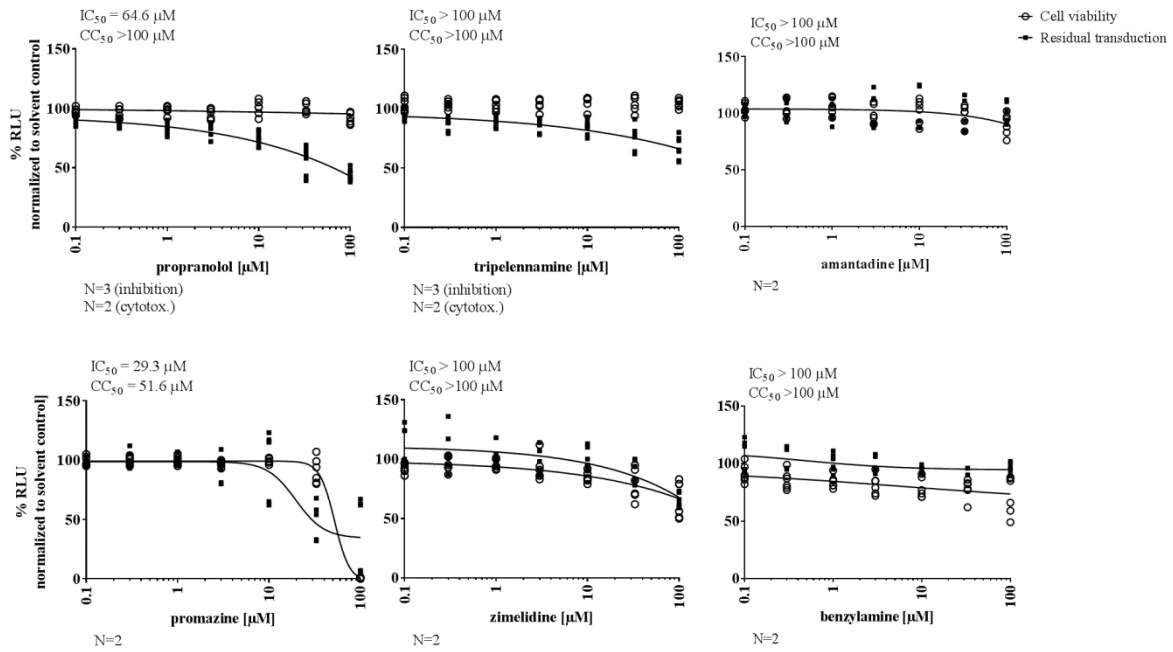

14

15 **Figure S2: Concentration-response curves of MARVpp gp-mediated antiviral**  
 16 **activity and cytotoxicity of the six weakest CADs of our screen.**

17 EA.hy926 cells were transduced with MARVpp and treated with the six CADs with  
 18 lowest antiviral activity in increasing concentrations: propranolol, tripeleonnamine,  
 19 amantadine, promazine, zimelidine or benzylamine (filled squares). Cytotoxicity  
 20 (empty circles) of these compounds was determined in EA.hy-NLuc. Luciferase  
 21 activity of transduced cells or NLuc cells was detected and normalised replicate  
 22 values of  $n = 2$  or  $n = 3$  experiments are shown. Concentration-response curves were  
 23 fitted for interpolation of  $\text{IC}_{50}$  and  $\text{CC}_{50}$  values.

24

25

26 **Figure S3: Molecular structures of the six strongest and six weakest antiviral**27 **CADs of our screen.**

| Dronedarone                                                                         | Triparanol                                                                          | Sertraline                                                                            |
|-------------------------------------------------------------------------------------|-------------------------------------------------------------------------------------|---------------------------------------------------------------------------------------|
| 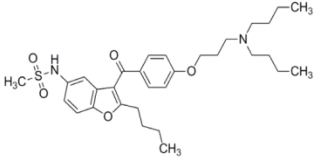   |    |    |
| Amiodarone                                                                          | Perhexiline                                                                         | Clomifene                                                                             |
|   |   |   |
| Propranolol                                                                         | Tripelennamine                                                                      | Amantadine                                                                            |
|  |  |  |
| Promazine                                                                           | Zimelidine                                                                          | Benzylamine                                                                           |
|  |  |  |

28

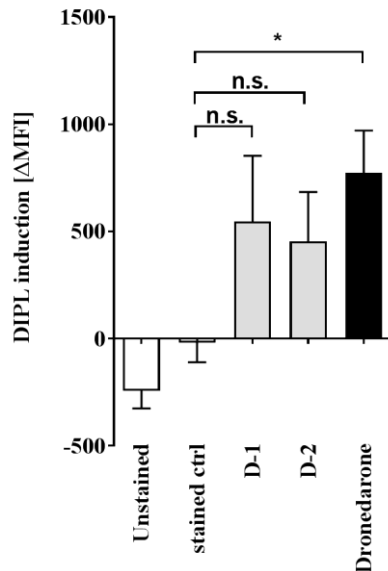

29

30 **Figure S4: DIPL of dronedarone-derivatives D-1 and D-2.**

31 Triplicates of EA.hy926 cells were treated with dronedarone and its two derivatives  
 32 D-1 and D-2 in a 5  $\mu$ M concentration together with LipidTox™ Green (1:1). After 6 h,  
 33 fresh medium containing the compounds (without LipidTox™) was added for extra 18  
 34 h. As controls, cells were left untreated (unstained) or treated with LipidTox™ in  
 35 absence of drugs (stained ctrl). Fluorescence measured by FACS represents DIPL  
 36 induction by CADs. Delta mean fluorescence intensity ( $\Delta$ MFI) was calculated by first  
 37 subtracting the average solvent control from single values. Averages of n=3  
 38 independent stainings were calculated and plotted against average antiviral activity.  
 39 Asterisks indicate statistical significance of differences between compounds and  
 40 stained control that was calculated by One-way ANOVA with correction for multiple  
 41 comparisons. (\*p<0.01; \*\*p<0.001;\*\*\*p<0.0001)

42
